# Supplementary material for: Multichannel electrochemical workstation-based data collection combined with machine learning for online analysis of tyrosine
Source: Royal Society of Chemistry journal article supplement (doi:10.1039/d3nj00351e), 2023-01-01
Supplement: d3nj00351e1.pdf [file d3nj00351e1.pdf]

## Supporting information

### **Multichannel electrochemical workstation-based data collection combined with machine learning for online analysis of tyrosine**

**Qiwen Bao<sup>1</sup>, Gang Li<sup>1</sup>, Zhengchun Yang<sup>2</sup>, Zilian Qu<sup>3</sup>, Jun Wei<sup>4</sup>, Wenbo Cheng<sup>5</sup>, and Ling Lin<sup>1\*</sup>**

<sup>1</sup>School of Precision Instrument and Optoelectronic Engineering, the State Key Laboratory of Precision Measuring Technology and Instruments, 92 Weijin Road, Tianjin University, Tianjin 300072, China

<sup>2</sup>School of Electrical and Electronic Engineering, Tianjin Key Laboratory of Film Electronic & Communication Devices, Advanced Materials and Printed Electronics Center, Tianjin University of Technology, Tianjin 300384, China

<sup>3</sup>Beijing Informat Technol Coll, Beijing 100015, China

<sup>4</sup>School of Materials Science and Engineering, Harbin Institute of Technology, Shenzhen 518055, China

<sup>5</sup>Suzhou Institute of Biomedical Engineering and Technology, Chinese Academy of Sciences, Suzhou 215163, China

\*Corresponding author; email: [linling@tju.edu.c](mailto:linling@tju.edu.c)

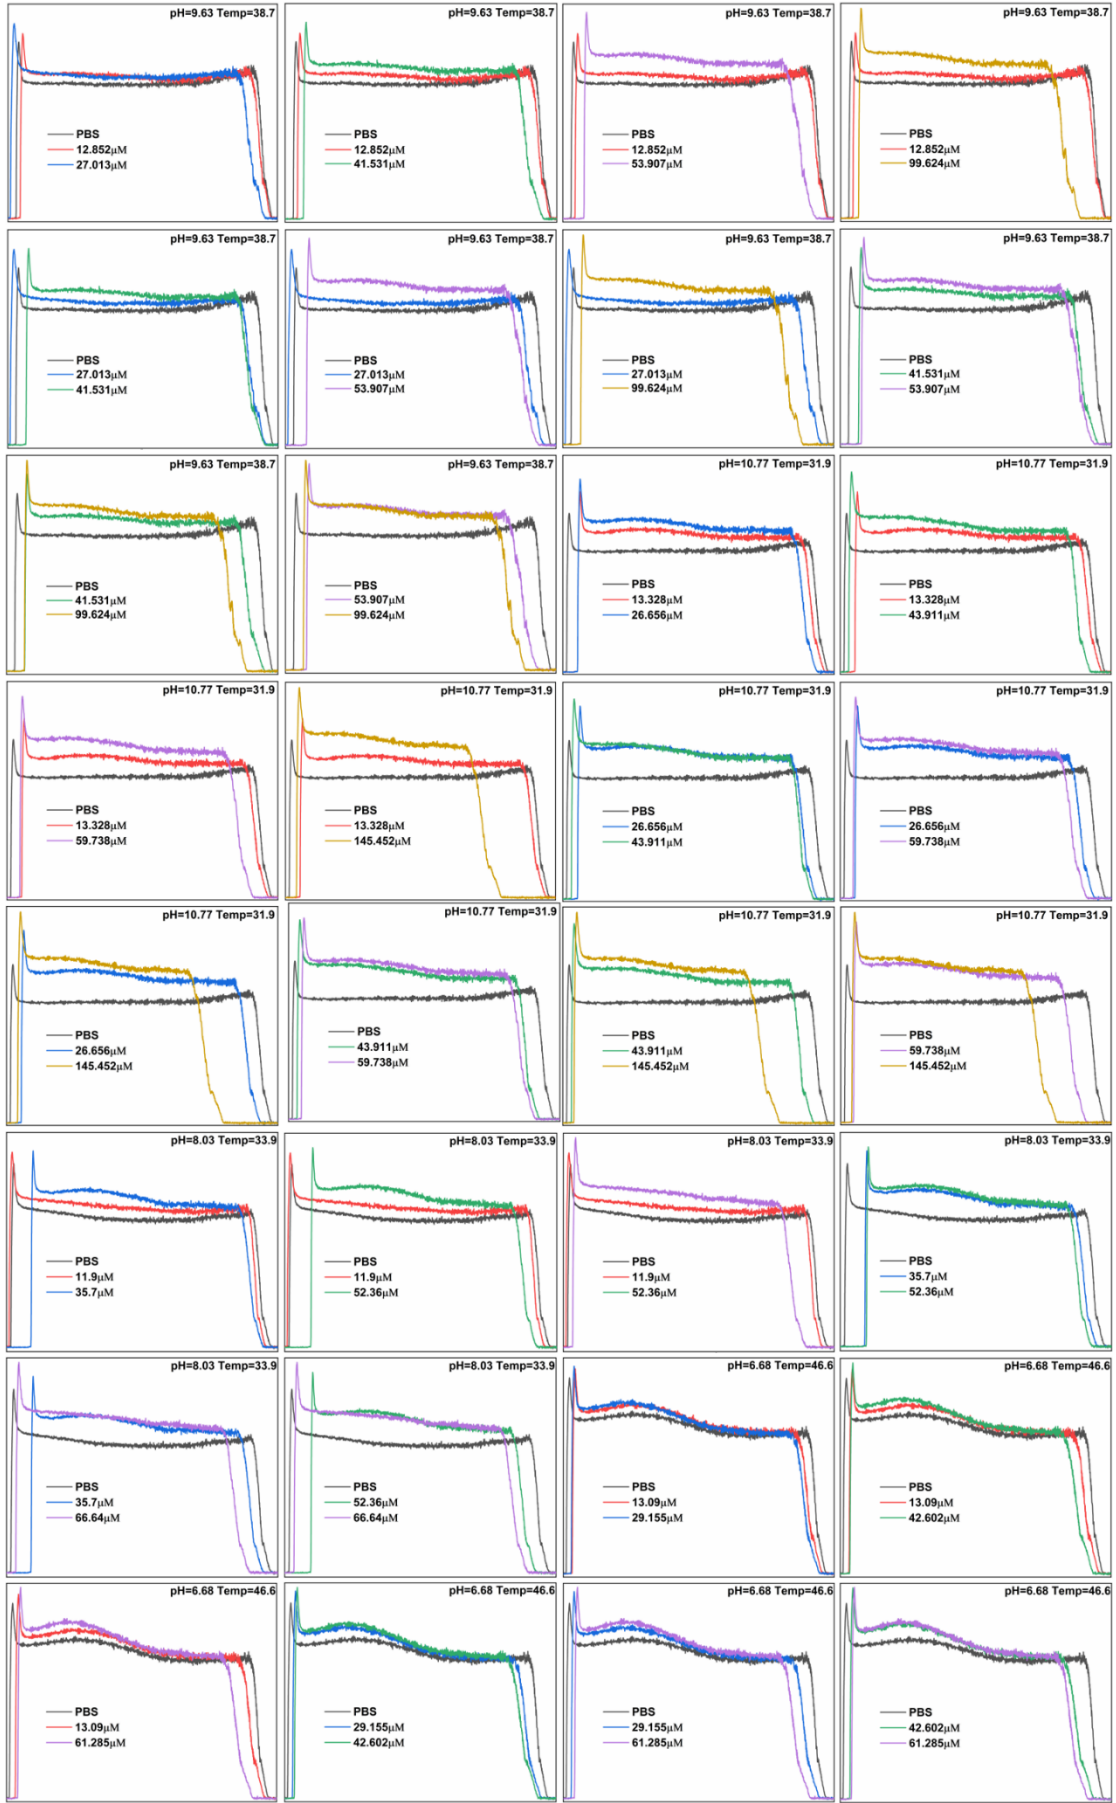

**Fig S1** Tyr assay DPV curves for 32 sets of samples.

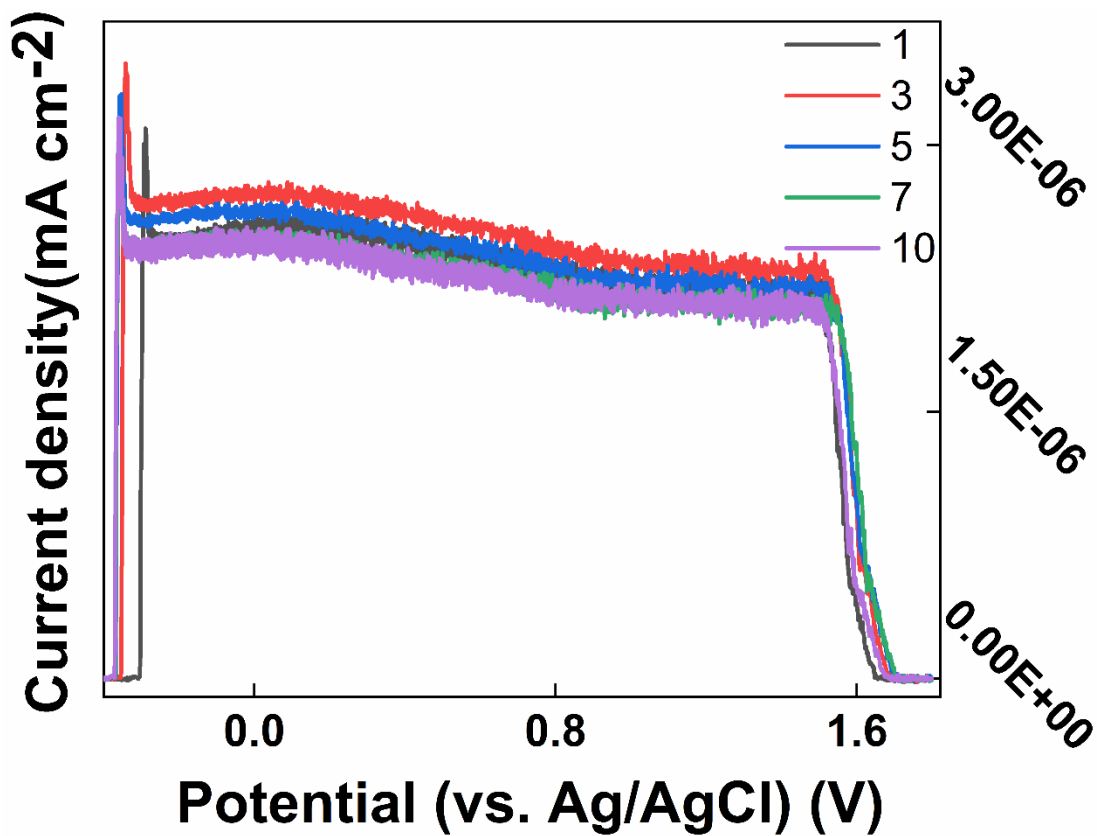

Fig S2 Repeatability of the electrode within one hour.

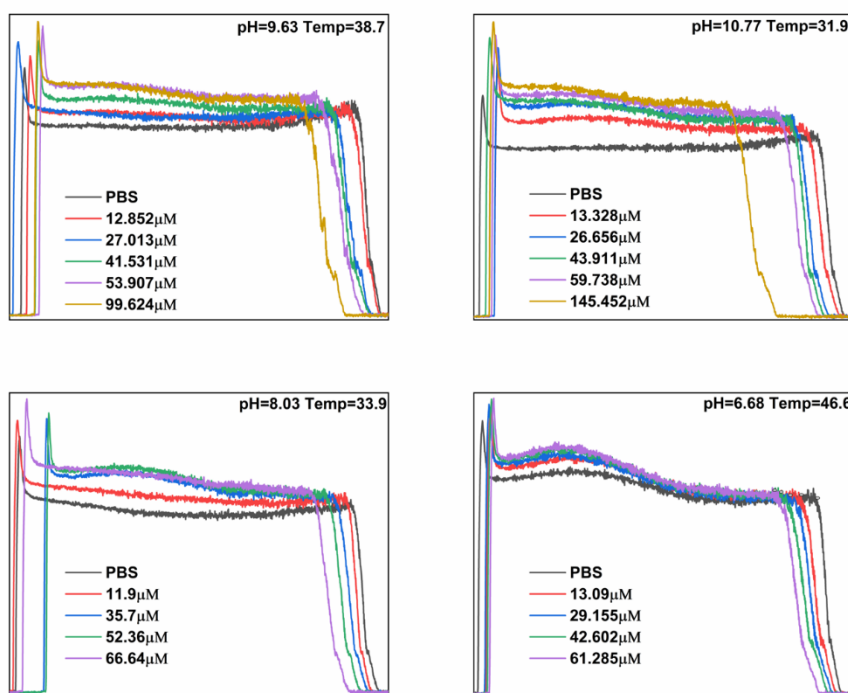

Fig S3 The CB-GO/CP electrode was equipped with a DPV response curve for tyrosine in the range of 11.9-145.452  $\mu\text{M}$  for the electrochemical workstation designed in this paper.

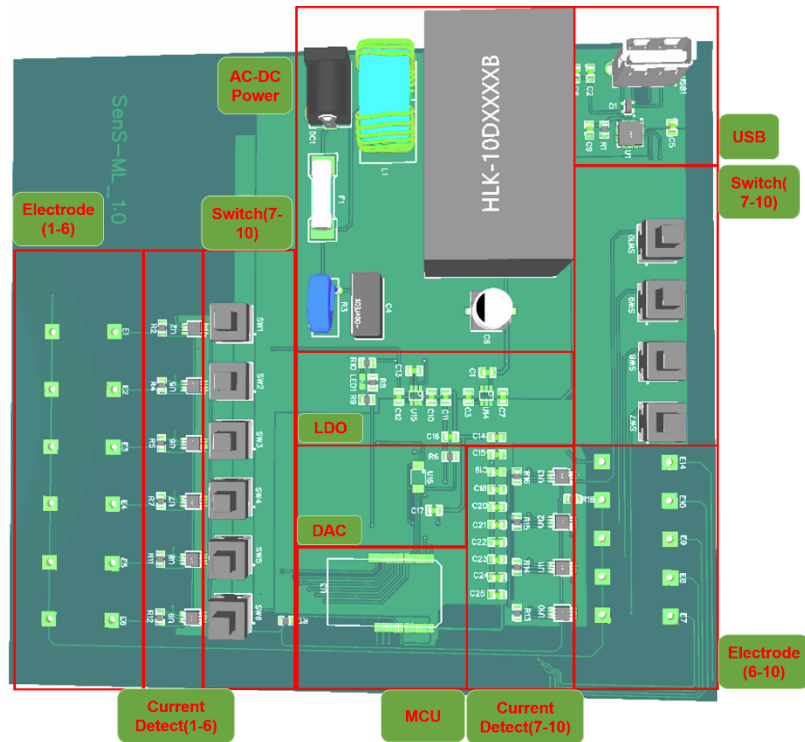

Fig S4 PCB and circuit composition of multi-channel electrochemical workstation.

Table S1 The 13 eigenvalues of the 32 sets of DPV curves.

|    | Con_   | I_0     | I_1     | I_2     | V_0    | V_1    | V_2    | VP_0   | VP_1   | VP_2   | Con_2  | pH   | Tem  |
|----|--------|---------|---------|---------|--------|--------|--------|--------|--------|--------|--------|------|------|
|    | I      |         |         |         |        |        |        |        |        |        |        |      | p    |
| 1  | 12.852 | 0.26671 | 0.26462 | 0.26096 | 1.5468 | 1.5034 | 1.4264 | 1.6028 | 1.5734 | 1.4922 | 27.013 | 9.63 | 38.7 |
| 2  | 12.852 | 0.26671 | 0.26462 | 0.26585 | 1.5468 | 1.5034 | 1.4166 | 1.6028 | 1.5734 | 1.4726 | 41.531 | 9.63 | 38.7 |
| 3  | 12.852 | 0.26671 | 0.26462 | 0.27865 | 1.5468 | 1.5034 | 1.3452 | 1.6028 | 1.5734 | 1.4292 | 53.907 | 9.63 | 38.7 |
| 4  | 12.852 | 0.26671 | 0.26462 | 0.27397 | 1.5468 | 1.5034 | 1.2262 | 1.6028 | 1.5734 | 1.3424 | 99.624 | 9.63 | 38.7 |
| 5  | 27.013 | 0.26671 | 0.26096 | 0.26585 | 1.5468 | 1.4264 | 1.4166 | 1.6028 | 1.4922 | 1.4726 | 41.531 | 9.63 | 38.7 |
| 6  | 27.013 | 0.26671 | 0.26096 | 0.27865 | 1.5468 | 1.4264 | 1.3452 | 1.6028 | 1.4922 | 1.4292 | 53.907 | 9.63 | 38.7 |
| 7  | 27.013 | 0.26671 | 0.26096 | 0.27397 | 1.5468 | 1.4264 | 1.2262 | 1.6028 | 1.4922 | 1.3424 | 99.624 | 9.63 | 38.7 |
| 8  | 41.531 | 0.26671 | 0.26585 | 0.30298 | 1.5468 | 1.4166 | 1.2304 | 1.6028 | 1.4726 | 1.4292 | 53.907 | 9.63 | 38.7 |
| 9  | 41.531 | 0.26671 | 0.26585 | 0.29906 | 1.5468 | 1.4166 | 1.2374 | 1.6028 | 1.4726 | 1.3424 | 99.624 | 9.63 | 38.7 |
| 10 | 53.907 | 0.26671 | 0.27865 | 0.27397 | 1.5468 | 1.3452 | 1.2262 | 1.6028 | 1.4292 | 1.3424 | 99.624 | 9.63 | 38.7 |
| 11 | 13.328 | 0.25738 | 0.27173 | 0.28424 | 1.5678 | 1.4838 | 1.425  | 1.6    | 1.5482 | 1.488  | 26.656 | 10.7 | 31.9 |
| 12 | 13.328 | 0.25738 | 0.27173 | 0.28324 | 1.5678 | 1.4838 | 1.4124 | 1.6    | 1.5482 | 1.4656 | 43.911 | 10.7 | 31.9 |
| 13 | 13.328 | 0.25738 | 0.27173 | 0.28753 | 1.5678 | 1.4838 | 1.348  | 1.6    | 1.5482 | 1.4138 | 59.738 | 10.7 | 31.9 |
| 14 | 13.328 | 0.25738 | 0.27173 | 0.29858 | 1.5678 | 1.4838 | 1.0624 | 1.6    | 1.5482 | 1.1562 | 145.45 | 10.7 | 31.9 |
| 15 | 26.656 | 0.25738 | 0.28424 | 0.28324 | 1.5678 | 1.425  | 1.4124 | 1.6    | 1.488  | 1.4656 | 43.911 | 10.7 | 31.9 |

|   |        |         |         |         |        |        |        |        |        |        |        |      |      |
|---|--------|---------|---------|---------|--------|--------|--------|--------|--------|--------|--------|------|------|
| 1 |        |         |         |         |        |        |        |        |        |        |        | 10.7 |      |
| 6 | 26.656 | 0.25738 | 0.28424 | 0.28753 | 1.5678 | 1.425  | 1.348  | 1.6    | 1.488  | 1.4138 | 59.738 | 7    | 31.9 |
| 1 |        |         |         |         |        |        |        |        |        |        | 145.45 | 10.7 |      |
| 7 | 26.656 | 0.25738 | 0.28424 | 0.1516  | 1.5678 | 1.425  | 1.0624 | 1.6    | 1.488  | 1.1562 | 2      | 7    | 31.9 |
| 1 |        |         |         |         |        |        |        |        |        |        |        | 10.7 |      |
| 8 | 43.911 | 0.25738 | 0.28324 | 0.28753 | 1.5678 | 1.4124 | 1.348  | 1.6    | 1.4656 | 1.4138 | 59.738 | 7    | 31.9 |
| 1 |        |         |         |         |        |        |        |        |        |        | 145.45 | 10.7 |      |
| 9 | 43.911 | 0.25738 | 0.28324 | 0.1516  | 1.5678 | 1.4124 | 1.0624 | 1.6    | 1.4656 | 1.1562 | 2      | 7    | 31.9 |
| 2 |        |         |         |         |        |        |        |        |        |        | 145.45 | 10.7 |      |
| 0 | 59.738 | 0.25738 | 0.28753 | 0.1516  | 1.5678 | 1.348  | 1.0624 | 1.6    | 1.4138 | 1.1562 | 2      | 7    | 31.9 |
| 2 |        |         |         |         |        |        |        |        |        |        |        | 6.86 | 46.6 |
| 1 | 13.09  | 0.24298 | 0.24684 | 0.24633 | 1.418  | 1.3382 | 1.2808 | 1.4418 | 1.3858 | 1.3536 | 29.155 |      |      |
| 2 |        |         |         |         |        |        |        |        |        |        |        | 6.86 | 46.6 |
| 2 | 13.09  | 0.24298 | 0.24684 | 0.25094 | 1.418  | 1.3382 | 1.2332 | 1.4418 | 1.3858 | 1.3228 | 42.602 |      |      |
| 2 |        |         |         |         |        |        |        |        |        |        |        | 6.86 | 46.6 |
| 3 | 13.09  | 0.24298 | 0.24684 | 0.2532  | 1.418  | 1.3382 | 1.208  | 1.4418 | 1.3858 | 1.285  | 61.285 |      |      |
| 2 |        |         |         |         |        |        |        |        |        |        |        | 6.86 | 46.6 |
| 4 | 29.155 | 0.24298 | 0.24633 | 0.25094 | 1.418  | 1.2808 | 1.2332 | 1.4418 | 1.3536 | 1.3228 | 42.602 |      |      |
| 2 |        |         |         |         |        |        |        |        |        |        |        | 6.86 | 46.6 |
| 5 | 29.155 | 0.24298 | 0.24633 | 0.2532  | 1.418  | 1.2808 | 1.208  | 1.4418 | 1.3536 | 1.285  | 61.285 |      |      |
| 2 |        |         |         |         |        |        |        |        |        |        |        | 6.86 | 46.6 |
| 6 | 42.602 | 0.24298 | 0.25094 | 0.2532  | 1.418  | 1.2332 | 1.208  | 1.4418 | 1.3228 | 1.285  | 61.285 |      |      |
| 2 |        |         |         |         |        |        |        |        |        |        |        | 8.03 | 33.9 |
| 7 | 11.9   | 0.22254 | 0.23026 | 0.23177 | 1.565  | 1.5328 | 1.4404 | 1.6028 | 1.5734 | 1.5244 | 35.7   |      |      |
| 2 |        |         |         |         |        |        |        |        |        |        |        | 8.03 | 33.9 |
| 8 | 11.9   | 0.22254 | 0.23026 | 0.23483 | 1.565  | 1.5328 | 1.4068 | 1.6028 | 1.5734 | 1.4782 | 52.36  |      |      |
| 2 |        |         |         |         |        |        |        |        |        |        |        | 8.03 | 33.9 |
| 9 | 11.9   | 0.22254 | 0.23026 | 0.2364  | 1.565  | 1.5328 | 1.32   | 1.6028 | 1.5734 | 1.397  | 66.64  |      |      |
| 3 |        |         |         |         |        |        |        |        |        |        |        | 8.03 | 33.9 |
| 0 | 35.7   | 0.22254 | 0.23177 | 0.23483 | 1.565  | 1.4404 | 1.4068 | 1.6028 | 1.5244 | 1.4782 | 52.36  |      |      |
| 3 |        |         |         |         |        |        |        |        |        |        |        | 8.03 | 33.9 |
| 1 | 35.7   | 0.22254 | 0.23177 | 0.2364  | 1.565  | 1.4404 | 1.32   | 1.6028 | 1.5244 | 1.397  | 66.64  |      |      |
| 3 |        |         |         |         |        |        |        |        |        |        |        | 8.03 | 33.9 |
| 2 | 52.36  | 0.22254 | 0.23483 | 0.2364  | 1.565  | 1.4068 | 1.32   | 1.6028 | 1.4782 | 1.397  | 66.64  |      |      |
